# Supplementary material for: Prominence of the tropics in the recent rise of global nitrogen pollution
Source: PubMed Central journal article supplement (PMC6440957; doi:10.1038/s41467-019-09468-4), 2019-03-29
Supplement: 41467_2019_9468_MOESM1_ESM.pdf [file 41467_2019_9468_MOESM1_ESM.pdf]

*Nature Communications*

Supplementary Information for

**Prominence of the tropics in the recent rise of global nitrogen pollution**

Minjin Lee et al.

Correspondence to: [minjinl@princeton.edu](mailto:minjinl@princeton.edu)

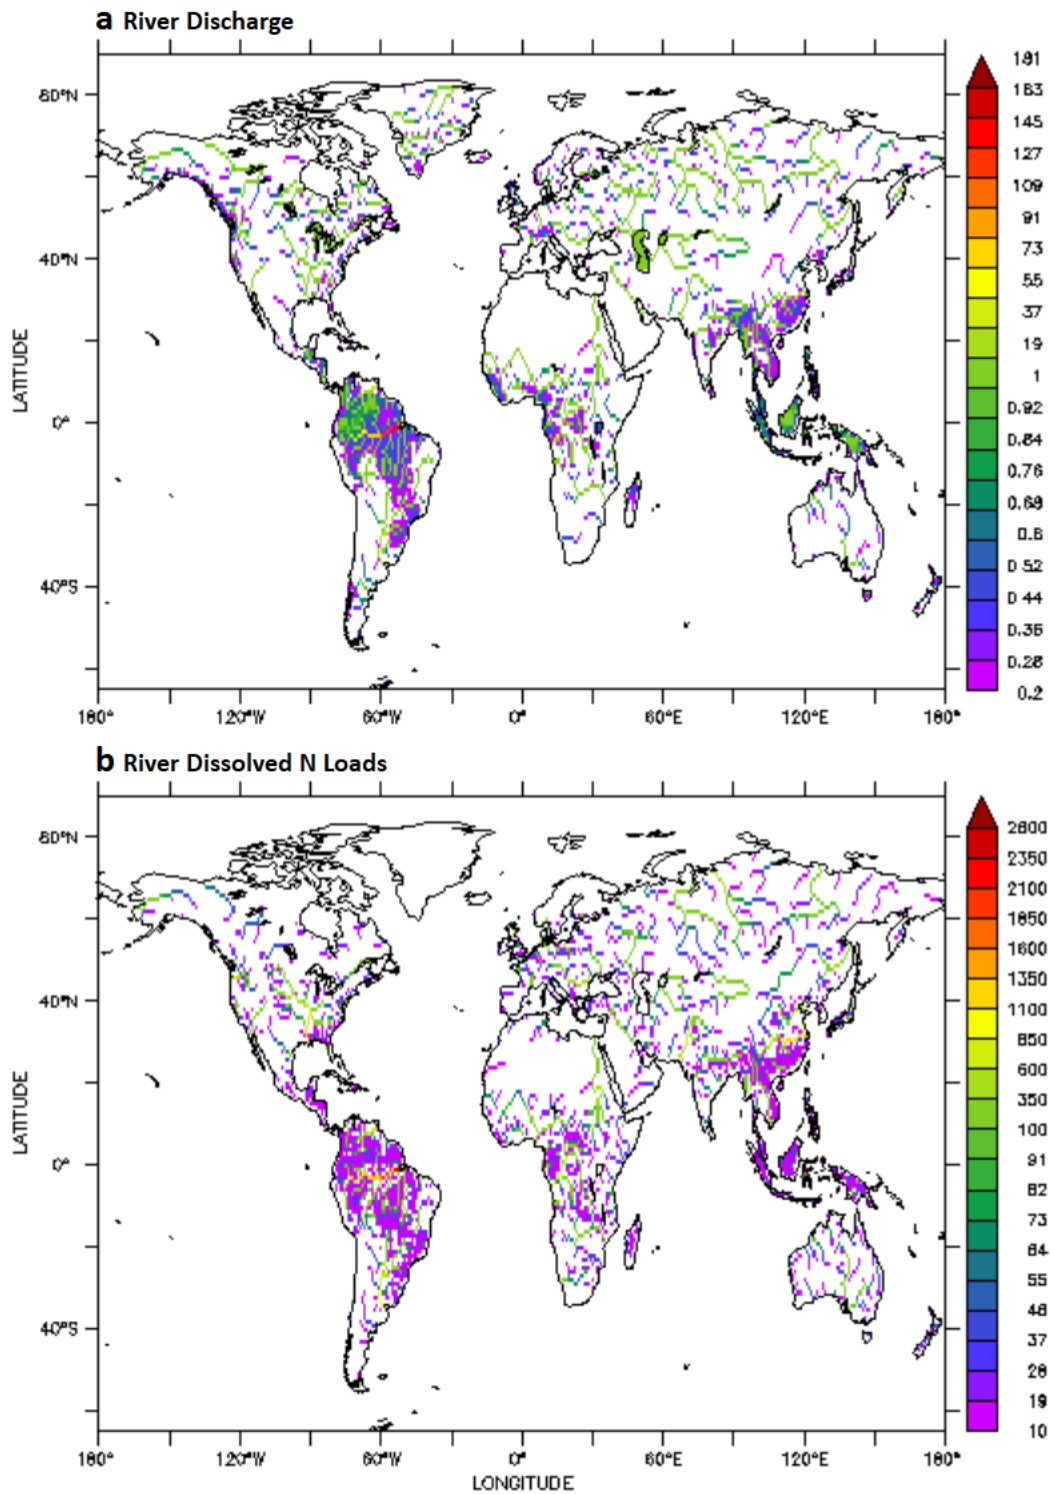

**Supplementary Figure 1. River discharge and dissolved N loads. a, b,** Simulated river discharge ( $10^3 \text{ m}^3 \text{ s}^{-1}$ ) (a) and dissolved N (DN) loads ( $\text{ktN yr}^{-1}$ ) (b) for the year 1995.

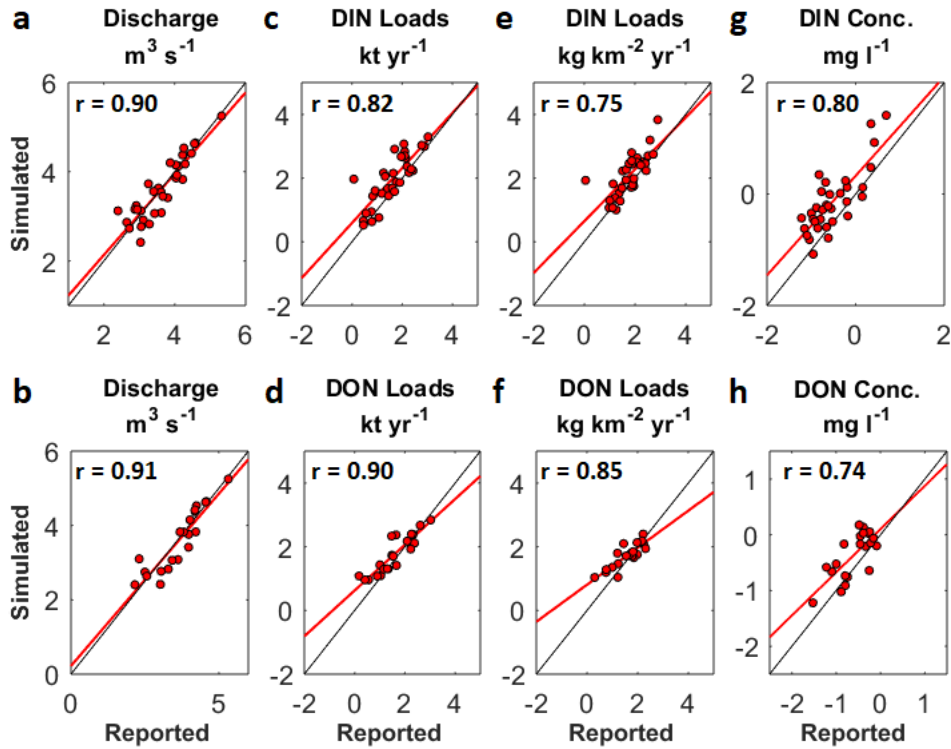

**Supplementary Figure 2. Reported and simulated river discharge and N loads.** LM3-TAN results were compared with reported river discharge and measurement-based estimates of dissolved organic N (DON) loads and concentrations from 21 large rivers<sup>1-2</sup> and reported river discharge and measurement-based estimates of dissolved inorganic N (DIN) loads and concentrations from 33 large rivers<sup>2-3</sup> for the year 1995 (Supplementary Table 2). **a, b**, discharge in  $\text{m}^3 \text{s}^{-1}$  (Log-scale); **c, d**, DIN and DON loads in  $\text{kt yr}^{-1}$  (Log-scale); **e, f**, DIN and DON loads in  $\text{kg km}^{-2} \text{yr}^{-1}$  (Log-scale); **g, h**, DIN and DON concentrations in  $\text{mg l}^{-1}$  (Log-scale).

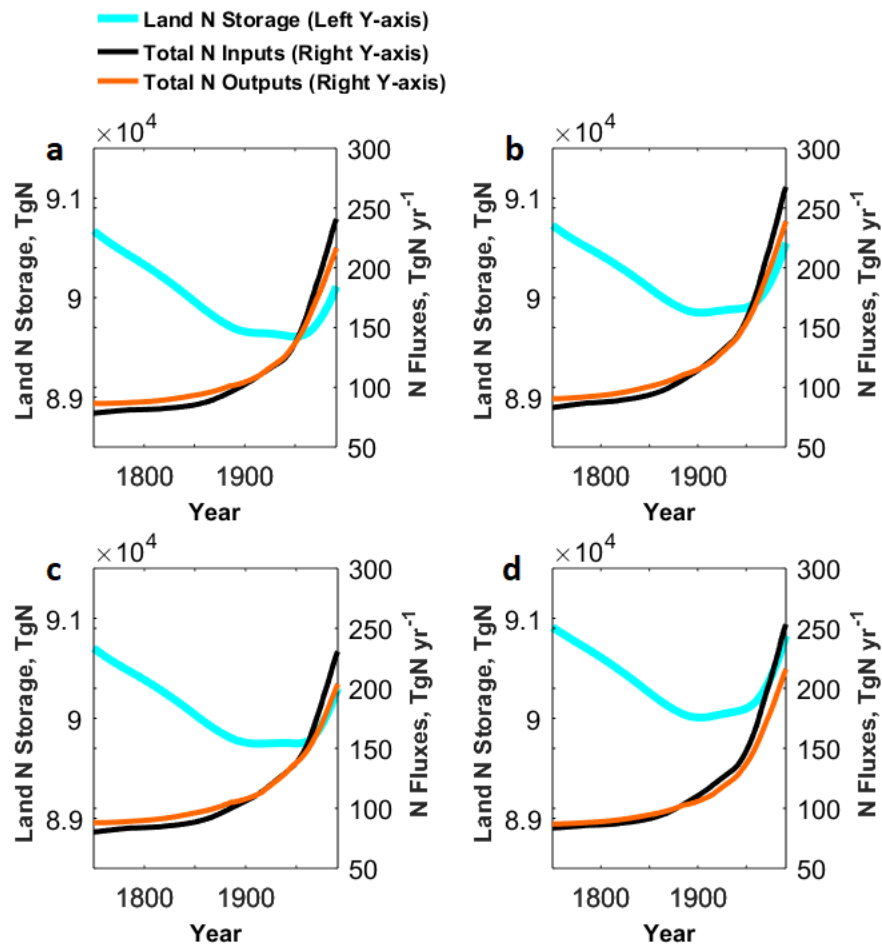

**Supplementary Figure 3. Global land N storage and fluxes under different scenarios. a-d**, Land N storage (cyan), total N inputs (black), and total N outputs (orange) in simulations with BNF settings spanning the upper (**a**) and lower (**b**) bounds of the published ranges<sup>4-5</sup>, different fertilizer inputs<sup>6</sup> (**c**), and a different LULUC scenario without shifting cultivation<sup>7</sup> (**d**) (See Methods). All plots show 30-year moving averages from 1750 to 2005.

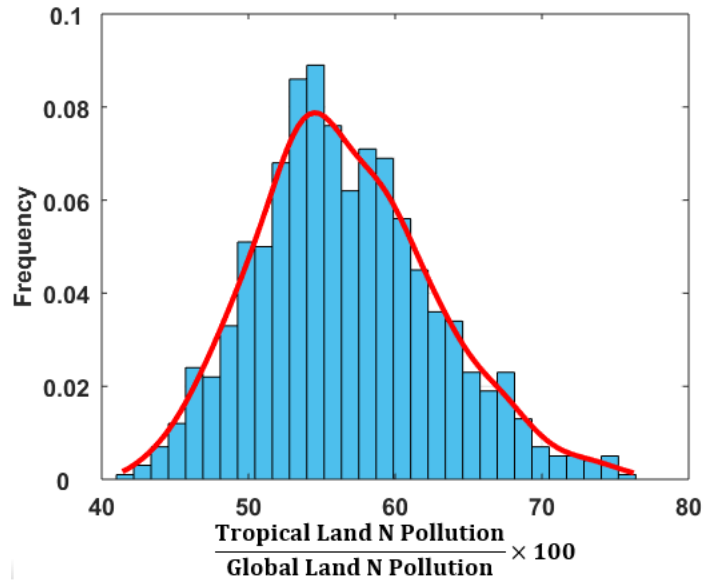

**Supplementary Figure 4. Prominence of the tropics in global N pollution.** Tropical (global) land N pollution was estimated as the sum of N outputs from tropical (global) land, minus the sum of environmentally benign portions of the outputs (See Methods and Supplementary Note 2). These estimates from the no CO<sub>2</sub> fertilization simulation suggest that the tropics create 57±6% of global land N pollution despite covering only 34% of global land area and receiving far lower amounts of synthetic fertilizers than the extratropics. The reported uncertainties consider the sensitivity of the pollution estimates to different partitioning of the outputs into environmentally benign vs. pollutant forms.

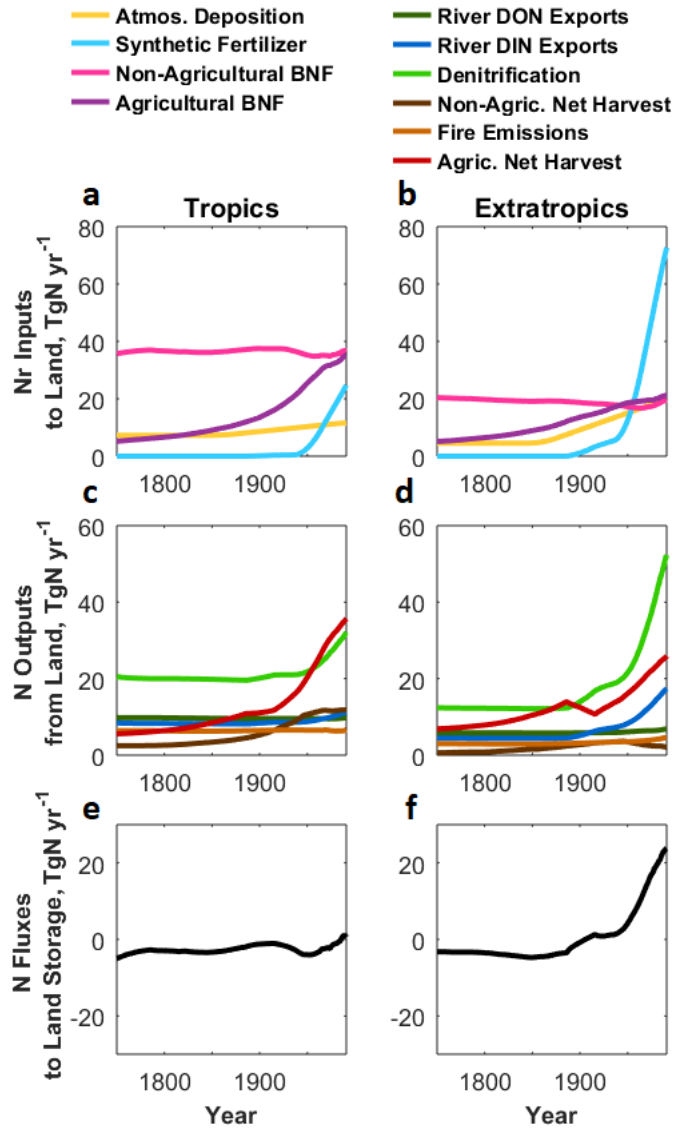

**Supplementary Figure 5. Land N fluxes in the tropics and extratropics.** This figure shows results, which were simulated by using the low BNF setting (See Methods and Supplementary Table 3). **a, b**, Land N inputs include atmospheric deposition (light orange), synthetic fertilizers (sky-blue), biological N fixation (BNF) in non-agricultural (plum) and agricultural (purple) lands. **c, d**, Land N outputs include river dissolved organic N (DON) exports (green), river dissolved inorganic N (DIN) exports (blue), soil and freshwater denitrification (light green), fire emissions (orange), net harvest in agricultural (red) and non-agricultural (brown) lands. **e, f**, N fluxes to land storage. All plots show 30-year moving averages from 1750 to 2005.

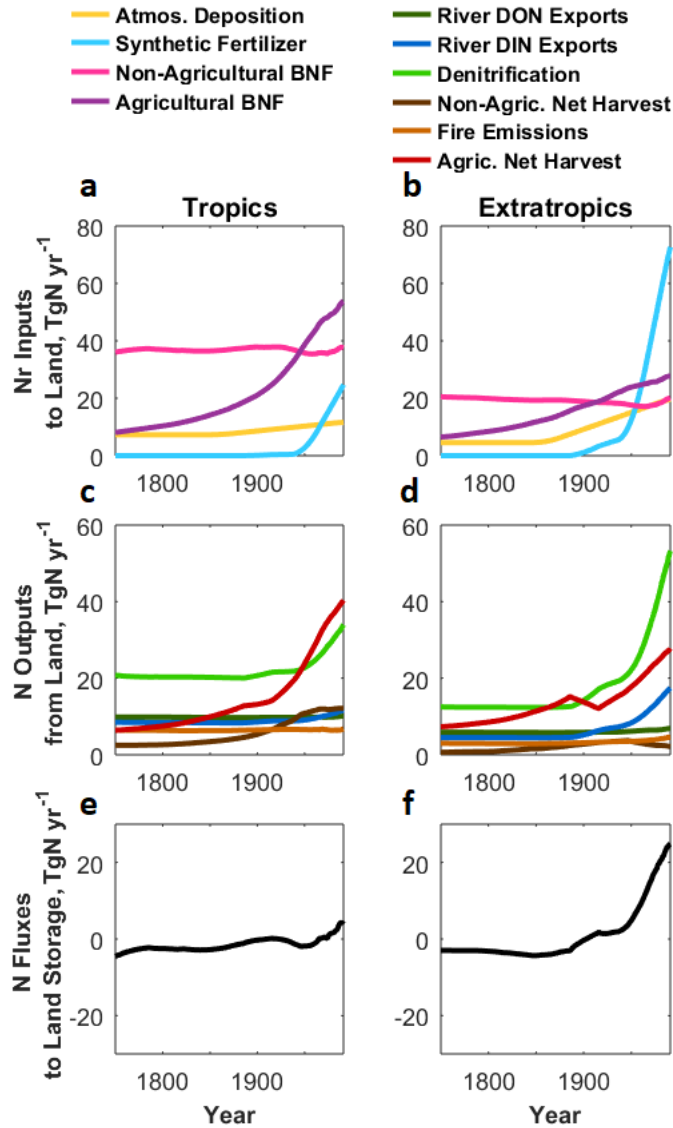

**Supplementary Figure 6. Land N fluxes in the tropics and extratropics.** This figure shows results, which were simulated by using the high BNF setting (See Methods and Supplementary Table 3). **a, b**, Land N inputs include atmospheric deposition (light orange), synthetic fertilizers (sky-blue), biological N fixation (BNF) in non-agricultural (plum) and agricultural (purple) lands. **c, d**, Land N outputs include river dissolved organic N (DON) exports (green), river dissolved inorganic N (DIN) exports (blue), soil and freshwater denitrification (light green), fire emissions (orange), net harvest in agricultural (red) and non-agricultural (brown) lands. **e, f**, N fluxes to land storage. All plots show 30-year moving averages from 1750 to 2005.

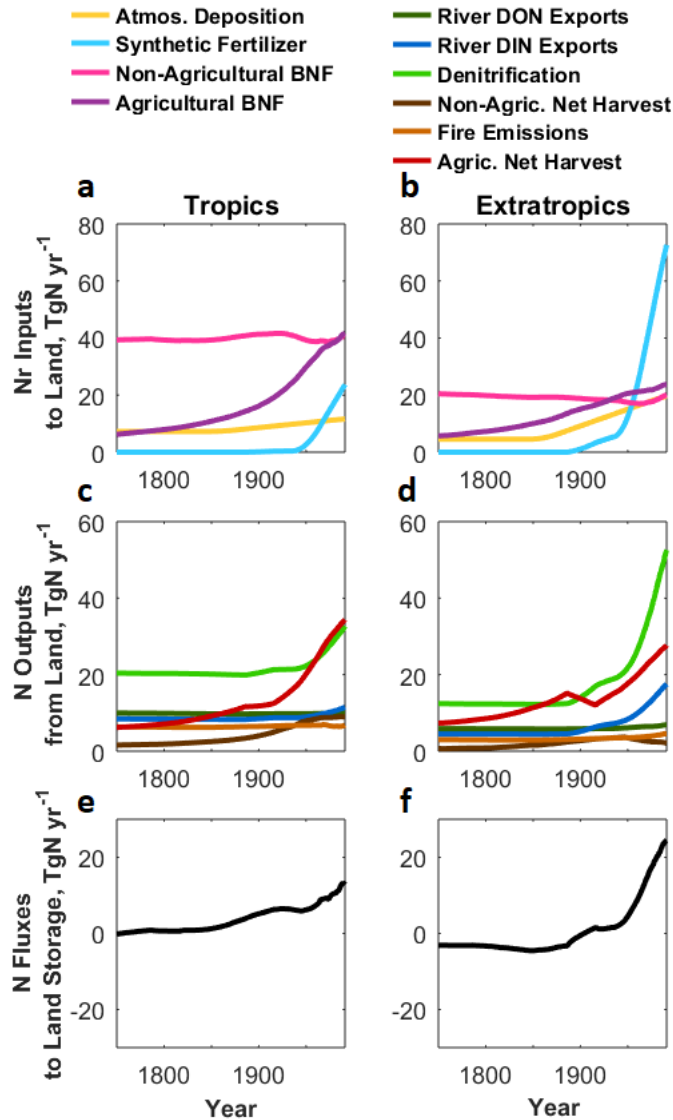

**Supplementary Figure 7. Land N fluxes in the tropics and extratropics.** This figure shows results, which were simulated by using a LULUC scenario without shifting cultivation<sup>7</sup>. **a, b**, Land Nr inputs include atmospheric deposition (light orange), synthetic fertilizers (sky-blue), biological N fixation (BNF) in non-agricultural (plum) and agricultural (purple) lands. **c, d**, Land N outputs include river dissolved organic N (DON) exports (green), river dissolved inorganic N (DIN) exports (blue), soil and freshwater denitrification (light green), fire emissions (orange), net harvest in agricultural (red) and non-agricultural (brown) lands. **e, f**, N fluxes to land storage. All plots show 30-year moving averages from 1750 to 2005.



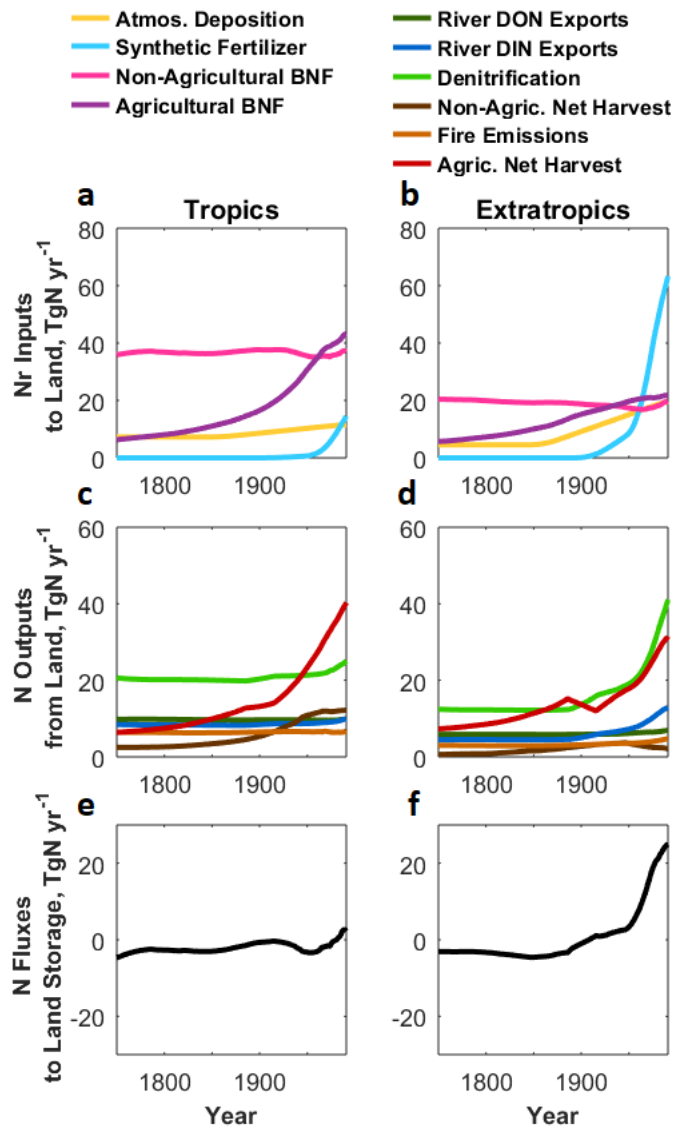

**Supplementary Figure 8. Land N fluxes in the tropics and extratropics.** This figure shows results, which were simulated by using fertilizer inputs from Lu and Tian<sup>6</sup>. **a, b**, Land N inputs include atmospheric deposition (light orange), synthetic fertilizers (sky-blue), biological N fixation (BNF) in non-agricultural (plum) and agricultural (purple) lands. **c, d**, Land N outputs include river dissolved organic N (DON) exports (green), river dissolved inorganic N (DIN) exports (blue), soil and freshwater denitrification (light green), fire emissions (orange), net harvest in agricultural (red) and non-agricultural (brown) lands. **e, f**, N fluxes to land storage. All plots show 30-year moving averages from 1750 to 2005.

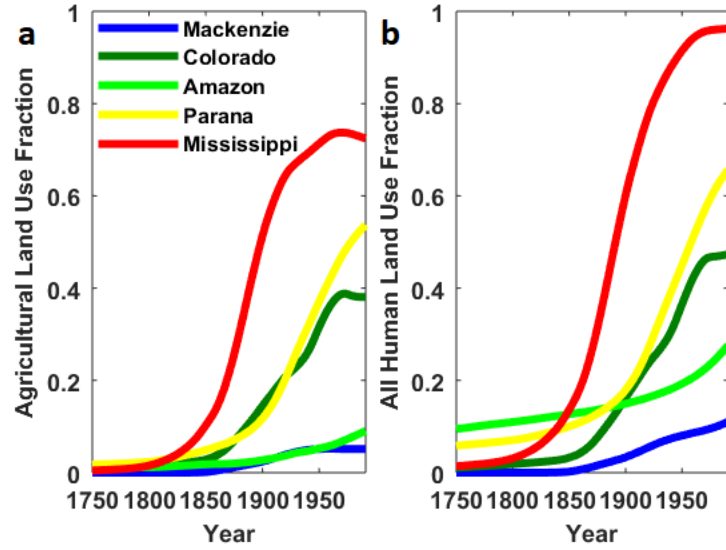

**Supplementary Figure 9. Historical human land-use changes.** Thirty-year moving averages of historical (1750-2005) land-use fraction changes for the Mackenzie (blue), Colorado (blue-green), Amazon (green), Parana (yellow), and Mississippi (red) River Basins. **a**, Agricultural land use (i.e., cropland and pasture); **b**, All land use disturbed by human activities (i.e., agricultural land use and secondary land use – abandoned agricultural land or regrowing forest after logging).

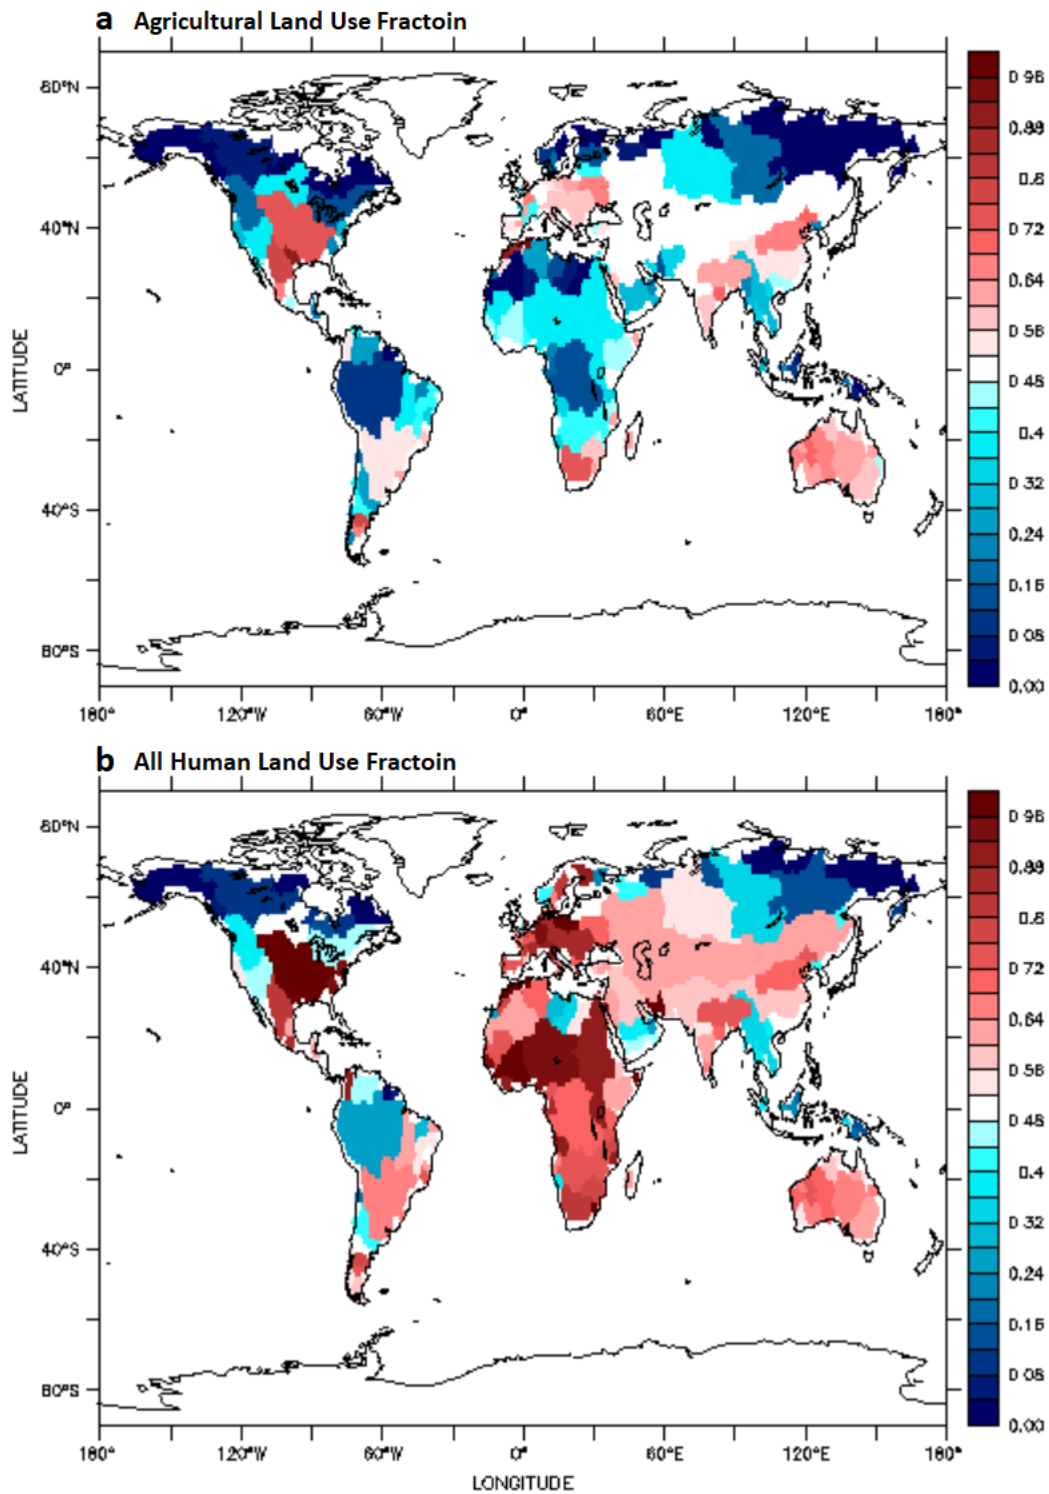

**Supplementary Figure 10. Global distributions of historical human land use.** Contemporary (1976-2005 mean) basin-wide mean fraction of human land use for 159 globally-distributed major river basins. **a**, Agricultural land use (cropland and pasture); **b**, All land use disturbed by human activities (i.e., agricultural land use and secondary land use (abandoned agricultural land or regrowing forest after logging)).

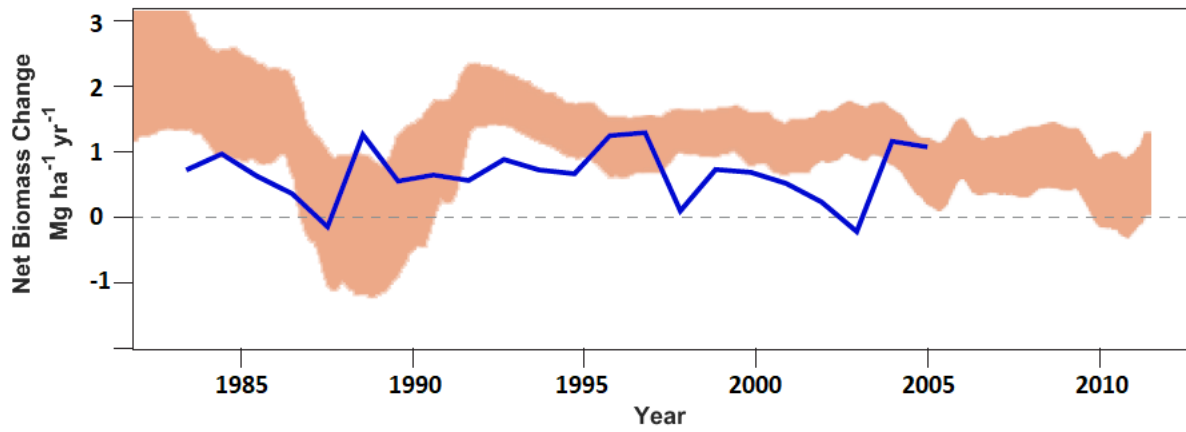

**Supplementary Figure 11. A long-term increase in the aboveground biomass density in Amazonian intact forests.** Our simulation shows positive net biomass changes in Amazonian intact forests during 1983-2005 (blue solid line), which are consistent with corresponding uncertainty bounds (shaded orange area) reported in Brienen and colleagues<sup>8</sup>.

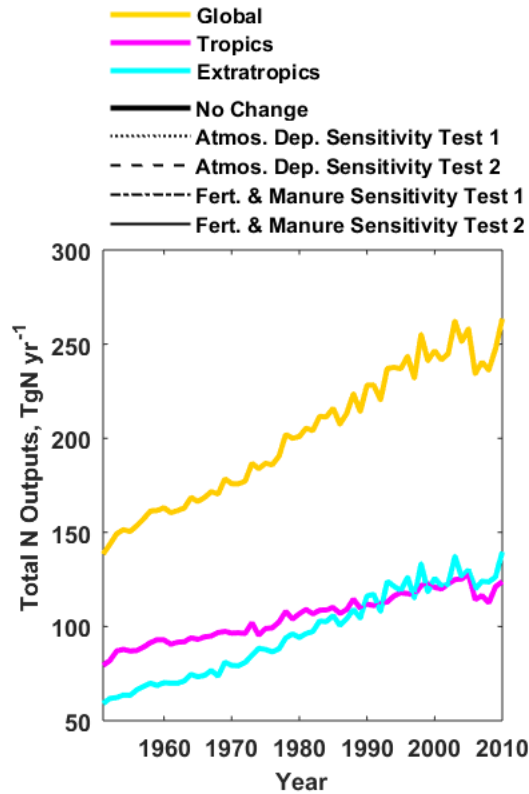

**Supplementary Figure 12. Sensitivity tests of different fractions to divide Nr inputs into three N species.** Each of Nr inputs was divided into three N species (i.e., organic, ammonium, and nitrate plus nitrite N) by multiplying reported fractions (See Methods and Supplementary Table 4)<sup>9-10</sup>. Sensitivity tests suggest that changing fractionation of N species has almost no influence on total land N outputs from global, tropical, and extratropical lands.

|   |                                          | <b>LM3-TAN<br/>1991-2005 average</b>                | <b>Published Estimates<br/>1990s, [2000s]</b>                              |
|---|------------------------------------------|-----------------------------------------------------|----------------------------------------------------------------------------|
| a | Biological N fixation (BNF)              | 128 (116-145)                                       | <sup>1</sup> 112, <sup>2</sup> 139                                         |
|   | Agricultural                             | 69 (59-85)                                          | <sup>2</sup> 32, [ <sup>3</sup> 50-70]                                     |
|   | Preindustrial                            | 76 (73-81)                                          | <sup>4</sup> 58 (40-100), <sup>5</sup> 195 (100-290)                       |
|   | Non-agricultural <sup>A</sup><br>Natural | 59 (58-62)                                          | <sup>2</sup> 107, <sup>6</sup> 128                                         |
| b | Atmospheric deposition                   | <sup>1</sup> 32                                     | <sup>2</sup> 59                                                            |
| c | Haber-Bosch (Synthetic fertilizers)      | <sup>7</sup> 114 ( <sup>7,8</sup> 88 <sup>B</sup> ) | <sup>2</sup> 100, [ <sup>9</sup> 120]                                      |
| d | Fluxes to the ocean                      | 49 (42-50)                                          | <sup>2</sup> 48, [ <sup>10,11</sup> 45]                                    |
| e | Fluxes to the atmosphere                 | 178 (150-198)                                       | <sup>2</sup> 189                                                           |
| f | Denitrification N <sub>2</sub> emissions | 104 (73-116) <sup>C</sup>                           | <sup>2</sup> 115 <sup>D</sup> , [ <sup>12</sup> 96 <sup>D</sup> ]          |
| g | Other emissions                          | 74 (77-82) <sup>E</sup>                             | <sup>2</sup> 74 <sup>F</sup> , <sup>13,14</sup> [70 (60-82) <sup>G</sup> ] |
| h | Fluxes to the land storage               | 32 (28-56)                                          | <sup>2</sup> 60, [ <sup>15</sup> 27]                                       |
| i | Soils/litter storage                     | 86124 (85924-86505)                                 | <sup>16</sup> 95000 (70000-820000)                                         |

<sup>A</sup>Primary plus secondary lands. (See Methods for a land-use description.)

<sup>B</sup>The sum of Lu and Tian<sup>6</sup>'s fertilizer to croplands and Bouwman and colleagues<sup>15</sup>'s fertilizer allocated to grasslands in mixed systems. (See Methods for model forcing and simulations.)

<sup>C</sup>Upper bound on total denitrification N<sub>2</sub> emissions. These fluxes are likely reduced by denitrification nitrous oxide (N<sub>2</sub>O) emissions. (See Supplementary Note 2.)

<sup>D</sup>Total denitrification N<sub>2</sub> emissions.

<sup>E</sup>Lower bound on other emissions of NO<sub>x</sub>, NH<sub>3</sub>, and N<sub>2</sub>O. These fluxes are likely enhanced by denitrification N<sub>2</sub>O emissions. (See Supplementary Note 2.)

<sup>F</sup>NO<sub>x</sub> and NH<sub>3</sub> emissions from food, energy, and natural sources, except combustion processes that create new Nr (See Table 2 in Galloway and colleagues<sup>4</sup>) plus N<sub>2</sub>O emissions from soils and rivers (See Table 3 in Galloway and colleagues<sup>4</sup>).

<sup>G</sup>NO<sub>x</sub> and NH<sub>3</sub> emissions from agriculture, biomass and biofuel burning, and soils under natural vegetation plus N<sub>2</sub>O emissions from agriculture, biomass and biofuel burning, human excreta, and soils under natural vegetation (See Table 6.9 in Ciais and colleagues<sup>20</sup>).

**Supplementary Table 1. Comparison of simulated global land N budgets with published estimates.**

References are marked as superscript: 1, Green and colleagues<sup>5</sup>; 2, Galloway and colleagues<sup>4</sup>; 3, Herridge and colleagues<sup>11</sup>; 4, Vitousek and colleagues<sup>12</sup>; 5, Cleveland and colleagues<sup>13</sup>; 6, Cleveland and colleagues<sup>14</sup>; 7, Bouwman and colleagues<sup>15</sup>; 8, Lu and Tian<sup>6</sup>; 9, Galloway and colleagues<sup>16</sup>; 10, Mayorga and colleagues<sup>17</sup>; 11, Seitzinger and colleagues<sup>18</sup>; 12, Bouwman and colleagues<sup>19</sup>; 13, Ciais and colleagues<sup>20</sup>; 14, Dentener and colleagues<sup>21</sup>; 15, Zaehle<sup>22</sup>; 16, Post and colleagues<sup>23</sup> and references in Post and colleagues. Units are TgN yr<sup>-1</sup> for fluxes and TgN for storage. The values in parentheses are the results with a range of BNF settings<sup>4-5</sup>, different fertilizers<sup>6,15</sup>, different LULUC<sup>7</sup>, and different fractionation of N species in Nr inputs<sup>9-10</sup> (See Methods).

| <b>Continent</b>                                                   | <b>River</b>         | <b>Basin Area<br/>km<sup>2</sup></b> | <b>River N Load<br/>kt yr<sup>-1</sup></b> | <b>River Discharge<br/>m<sup>3</sup> s<sup>-1</sup></b> |
|--------------------------------------------------------------------|----------------------|--------------------------------------|--------------------------------------------|---------------------------------------------------------|
| <b>Reported river discharge and DON loads from 21 large rivers</b> |                      |                                      |                                            |                                                         |
| South America                                                      | Amazon               | 6112000                              | 1056                                       | 209315                                                  |
| Africa                                                             | Zaire                | 3698000                              | 213                                        | 37524                                                   |
| North America                                                      | Mississippi          | 2926507                              | 408                                        | 15776                                                   |
| South America                                                      | Parana               | 2783000                              | 45                                         | 17650                                                   |
| Asia                                                               | Lena                 | 2490000                              | 241                                        | 16581                                                   |
| North America                                                      | Mackenzie            | 1787000                              | 30                                         | 9633                                                    |
| Africa                                                             | Niger                | 1200000                              | 20                                         | 4887                                                    |
| South America                                                      | Orinoco              | 1100000                              | 181                                        | 35927                                                   |
| Asia                                                               | Ganges               | 1050000                              | 30                                         | 15649                                                   |
| North America                                                      | St. Lawrence         | 1020000                              | 10                                         | 10674                                                   |
| Africa                                                             | Orange               | 1000000                              | 2                                          | 317                                                     |
| North America                                                      | Yukon                | 831387                               | 171                                        | 9491                                                    |
| Europe                                                             | Danube               | 817000                               | 123                                        | 6477                                                    |
| Asia                                                               | Kolyma               | 660000                               | 46                                         | 4186                                                    |
| North America                                                      | Colorado             | 638951                               | 4                                          | 203                                                     |
| North America                                                      | Rio Grande (TX)      | 456701                               | 3                                          | 145                                                     |
| Asia                                                               | Khatanga             | 364000                               | 34                                         | 2655                                                    |
| Asia                                                               | Indigirka            | 362000                               | 22                                         | 1951                                                    |
| Asia                                                               | Yana                 | 238000                               | 11                                         | 1057                                                    |
| Asia                                                               | Olenek               | 219000                               | 14                                         | 1111                                                    |
| North America                                                      | Brazos+Colorado (TX) | 225355                               | 8                                          | 365                                                     |
| <b>Reported river discharge and DIN loads from 33 large rivers</b> |                      |                                      |                                            |                                                         |
| South America                                                      | Amazon               | 6112000                              | 1054                                       | 208968                                                  |
| Africa                                                             | Zaire                | 3698000                              | 120                                        | 38052                                                   |
| Asia                                                               | Ob                   | 2990000                              | 267                                        | 12811                                                   |
| North America                                                      | Mississippi          | 2980000                              | 762                                        | 16774                                                   |
| South America                                                      | Parana               | 2783000                              | 125                                        | 18011                                                   |
| Asia                                                               | Yenisei              | 2590000                              | 186                                        | 19660                                                   |
| Asia                                                               | Lena                 | 2490000                              | 58                                         | 16648                                                   |
| Asia                                                               | Amur                 | 1855000                              | 155                                        | 10908                                                   |
| Asia                                                               | Chang Jiang          | 1808000                              | 594                                        | 29427                                                   |
| Africa                                                             | Zambezi              | 1330000                              | 18                                         | 3361                                                    |
| South America                                                      | Orinoco              | 1100000                              | 136                                        | 35991                                                   |
| Australia                                                          | Murray               | 1060000                              | 1                                          | 251                                                     |
| North America                                                      | St. Lawrence         | 1020000                              | 81                                         | 10686                                                   |
| Asia                                                               | Indus                | 916000                               | 125                                        | 1807                                                    |
| North America                                                      | Yukon                | 849000                               | 26                                         | 6342                                                    |
| Asia                                                               | Huang He             | 752000                               | 91                                         | 1300                                                    |
| North America                                                      | Columbia             | 669000                               | 50                                         | 7484                                                    |
| Asia                                                               | Kolyma               | 660000                               | 12                                         | 4186                                                    |

|               |                        |        |     |       |
|---------------|------------------------|--------|-----|-------|
| Asia          | Zhujiang               | 437000 | 229 | 11511 |
| Asia          | Khatanga               | 364000 | 6   | 2705  |
| Asia          | Indigirka              | 362000 | 4   | 1934  |
| Europe        | N. Dvina               | 348000 | 15  | 3488  |
| Europe        | Pechora                | 324000 | 29  | 4154  |
| North America | Churchill (Hudson Bay) | 298000 | 3   | 819   |
| Europe        | Neva                   | 282000 | 21  | 2549  |
| South America | Uruguay                | 240000 | 41  | 4598  |
| Asia          | Yana                   | 238000 | 6   | 1088  |
| Asia          | Olenek                 | 219000 | 3   | 1135  |
| Africa        | Rufiji                 | 178000 | 49  | 1116  |
| Europe        | Elbe                   | 146000 | 116 | 752   |
| Asia          | Chao Phraya            | 114000 | 7   | 882   |
| North America | Balsas                 | 112000 | 8   | 444   |
| Europe        | Odra                   | 112000 | 44  | 526   |

**Supplementary Table 2. Reported river discharge and N loads.** LM3-TAN results were compared with reported river discharge and measurement-based estimates of dissolved organic N (DON) loads and concentrations from 21 large rivers<sup>1-2</sup> and reported river discharge and measurement-based estimates of dissolved inorganic N (DIN) loads and concentrations from 33 large rivers<sup>2-3</sup> for the year 1995 (Supplementary Figures 1 and 2). We chose the rivers of which basin areas are larger than 100,000 km<sup>2</sup> and log<sub>10</sub> of their discharges are larger than 2.2.



| Parameter                                                | Description                                                                 | Value                    | Unit     | Reference or Rationale                                                                     |
|----------------------------------------------------------|-----------------------------------------------------------------------------|--------------------------|----------|--------------------------------------------------------------------------------------------|
| <b>Parameters in the terrestrial component equations</b> |                                                                             |                          |          |                                                                                            |
| $r_{DOM}, r_{NH_4^+}, r_{NO_3^-}$                        | calibration factors for dissolved organic matter, ammonium N, and nitrate N | 1, 1, 50                 | unitless | calibrated to match stream N loads adjusted from Lee and colleagues <sup>24</sup>          |
| $f_{DOM}$                                                | fraction of litter soil decomposition that becomes potential DOM            | 0.2                      | unitless | calibrated to match stream DON loads adjusted from Gerber and colleagues <sup>25</sup>     |
| $k_{SS}$                                                 | decomposition rate of slow soil                                             | 0.03                     | 1/year   | Parton and colleagues <sup>26</sup><br>adjusted from Gerber and colleagues <sup>25</sup>   |
| $r_{SS}$                                                 | C:N ratio of slow soil                                                      | 13.3                     | unitless | Post and colleagues <sup>23</sup><br>adjusted from Gerber and colleagues <sup>25</sup>     |
| $r_{L,tropical}$                                         | C:N ratio in tropical vegetation leaves                                     | 25                       | unitless | Cernusak and colleagues <sup>27</sup><br>adjusted from Gerber and colleagues <sup>25</sup> |
| $l_{BNF}$                                                | upper limit of biological fixation                                          | 60 (40-120)              | kg/ha/yr | Cleveland and colleagues <sup>13</sup><br>newly introduced                                 |
| <b>Parameters in the freshwater component equations</b>  |                                                                             |                          |          |                                                                                            |
| $k'_{denitr,min}$                                        | minimum reaction rate constant of river denitrification                     | 0.034/86400              | 1/s      | Alexander and colleagues <sup>28</sup><br>adjusted from Lee and colleagues <sup>24</sup>   |
| $k''_{denit,min}$                                        | minimum reaction rate constant of lake denitrification                      | 0.034/86400              | 1/s      | Alexander and colleagues <sup>28</sup><br>newly introduced                                 |
| $k''_{denit,max}$                                        | maximum reaction rate constant of river denitrification                     | 0.05/86400               | 1/s      | calibrated to match river N exports<br>newly introduced                                    |
| $k''_{min}, k''_{nit}$                                   | reaction rate constants of lake mineralization and nitrification            | 0.11/86400<br>0.51/86400 | 1/s      | calibrated to match lake mineralization and nitrification<br>newly introduced              |
| $T''_p$                                                  | parameter                                                                   | 1.047                    | unitless | Wade and colleagues <sup>29</sup><br>newly introduced                                      |
| $T''_r$                                                  | Reference lake water temperature                                            | 20                       | °C       | Wade and colleagues <sup>29</sup><br>newly introduced                                      |

**Supplementary Table 3. Newly introduced or adjusted parameters from the earlier developments.**

The calibration factors were introduced by Lee and colleagues<sup>24</sup> to compensate for processes that were not accounted for in the model, such as impacts of soil microbes and N storage in lentic systems. The incorporation of the lake N cycle into the model led these parameters to be adjusted at lower values than in the previous development. Uncertainty tests of low and high BNF (116 and 145 TgN yr<sup>-1</sup>) were simulated by setting an upper limit of BNF as 40 and 120 kgN ha<sup>-1</sup> yr<sup>-1</sup> respectively (See Supplementary Table 1 and Supplementary Note 1).

|                                           | <b>Organic N</b> | <b>Ammonium N</b> | <b>Nitrate plus nitrite N</b> |
|-------------------------------------------|------------------|-------------------|-------------------------------|
| Atmos. dep.                               | 0                | 49.0              | 51.0                          |
| Atmos. dep. sensitivity test 1            | 0                | 62.0              | 38.0                          |
| Atmos. dep. sensitivity test 2            | 0                | 36.0              | 64.0                          |
| Fertilizers and manure                    | 35.8             | 51.1              | 13.1                          |
| Fertilizers and manure sensitivity test 1 | 26.0             | 64.0              | 10.0                          |
| Fertilizers and manure sensitivity test 2 | 45.0             | 38.0              | 17.0                          |
| Urban wastewaters                         | 63.4             | 21.3              | 15.3                          |

**Supplementary Table 4. Reported fractions to divide N inputs into three N species.** Atmospheric deposition was divided into ammonium and nitrate plus nitrite N by using reported fractions of multi-model mean N deposition from the Atmospheric Chemistry and Climate Model Intercomparison Project<sup>9</sup>. For fertilizers, manure, and urban wastewater, reported input fractions for the Chesapeake Bay Program's Watershed Model were adopted<sup>10</sup>. We did not conduct sensitivity tests for urban wastewaters, because their amount is very small compared to the other N sources. Sensitivity tests show that different fractions (i.e., -25% and +25% fractions of the dominant N species for each N source) have almost no influence on land N storage and fluxes (Supplementary Figure 12).

**Supplementary Note 1. Comparison of simulated global land nitrogen (N) budgets with published estimates.** We compare simulated global land N storage and fluxes with published estimates in 16 different studies<sup>4,6,11-23</sup> (Supplementary Table 1). We focus on agreement during the contemporary period, which is of primary interest to the results of this paper and for which more data is available. While published N storage and flux estimates are invaluable in identifying and understanding the dominant global N cycling processes, the authors of these studies also acknowledge considerable uncertainties due to sparse measurements and subsequent assumptions required to estimate the global magnitude of different N cycling processes. We thus emphasize consistency in the magnitude and direction of N storage and fluxes.

Simulated contemporary BNF in our baseline simulation (128 TgN yr<sup>-1</sup>) is between 112 TgN yr<sup>-1</sup> estimated by Green and colleagues<sup>5</sup> and 139 TgN yr<sup>-1</sup> estimated by Galloway and colleagues<sup>4</sup> (Supplementary Table 1a). Simulated preindustrial BNF (76 TgN yr<sup>-1</sup>) is well within the latest estimate of 58 (40-100) TgN yr<sup>-1</sup> by Vitousek and colleagues<sup>12</sup>. Simulated BNF in agricultural lands (cropland and pasture; 69 TgN yr<sup>-1</sup>) is within the latest BNF estimate in agricultural systems (50-70 TgN yr<sup>-1</sup>) by Herridge and colleagues<sup>11</sup>. Our estimate lies on the high end of Herridge and colleagues<sup>11</sup>'s range, in part, because the agricultural land area simulated by using the LULUC scenarios of Hurtt and colleagues<sup>7</sup> (49 10<sup>6</sup>km<sup>2</sup>) is larger than the area considered to calculate the Herridge and colleagues<sup>11</sup>'s estimate (27 10<sup>6</sup>km<sup>2</sup>). See Methods for a land-use description.

Simulated BNF in non-agricultural (primary and secondary) lands (59 TgN yr<sup>-1</sup>) is smaller than published BNF in natural systems by Galloway and colleagues<sup>4</sup> (107 TgN yr<sup>-1</sup>) and by Cleveland and colleagues<sup>14</sup> (128 TgN yr<sup>-1</sup>). In contrast to agricultural BNF, this is partly because the non-agricultural land area derived from Hurtt and colleagues<sup>7</sup>'s LULUC scenarios (82 10<sup>6</sup>km<sup>2</sup>) is smaller than the area considered to calculate the Cleveland and colleagues<sup>14</sup>'s estimate (104 10<sup>6</sup>km<sup>2</sup>). Furthermore, we note the suggestion by Vitousek and colleagues<sup>12</sup> that contemporary natural BNF is likely lower than their preindustrial estimate 58 (40-100) TgN yr<sup>-1</sup> due to land conversion for cultivation and perhaps to downregulation of BNF under increasing anthropogenic Nr inputs. This implies that the estimates of Galloway and colleagues<sup>4</sup> and Cleveland and colleagues<sup>14</sup> may be high.

The range of published BNF estimates highlights the substantial uncertainty in this important element of the N budgets. As noted in the main text, we thus conducted uncertainty tests of low and high contemporary BNF (116 and 145 TgN yr<sup>-1</sup>, see Supplementary Table 3). The results suggest that the different BNF settings have little effect on the patterns of global, extratropical, and tropical land N fluxes and pollution (Figures 3a and 4, Table 1, Supplementary Figures 3, 5, and 6).

Moving on to atmospheric N deposition, Galloway and colleagues<sup>4</sup> estimated 59 TgN yr<sup>-1</sup> as the sum of atmospheric NO<sub>y</sub> (25 TgN yr<sup>-1</sup>) and NH<sub>x</sub> (34 TgN yr<sup>-1</sup>) deposition to land, while Green and colleagues<sup>5</sup> estimated 32 TgN yr<sup>-1</sup> (Supplementary Table 1b). We used the Green and colleagues<sup>4</sup>'s estimate of atmospheric deposition.

For fertilizer, we applied estimates from Bouwman and colleagues<sup>15</sup> (114 TgN yr<sup>-1</sup>) that are between the Haber-Bosch estimate by Galloway and colleagues<sup>4</sup> (100 TgN yr<sup>-1</sup> for 1990s) and that by Galloway and colleagues<sup>16</sup> (120 TgN yr<sup>-1</sup> for 2000s) (Supplementary Table 1c). We also conducted an uncertainty test of different fertilizer by Lu and Tian<sup>6</sup>. Applications of the both fertilizers show higher land N sequestration in the extratropics than in the tropics (Figure 3a) and create similar global, extratropical, and tropical land N pollution and fluxes (Figures 3a and 4, Table 1, Supplementary Figures 3 and 8).

Simulated N fluxes to the ocean (49 TgN yr<sup>-1</sup>) is consistent with 48 TgN yr<sup>-1</sup> estimated by Galloway and colleagues<sup>4</sup> and 45 TgN yr<sup>-1</sup> estimated by Mayorga and colleagues<sup>17</sup> and Seitzinger and colleagues<sup>18</sup> (Supplementary Table 1d). We further evaluate N fluxes to the ocean by comparing simulated regional

river dissolved inorganic and organic N loads and concentrations with measurement-based estimates from 47 major rivers, which are distributed broadly over the globe and influenced by various climates, biomes, and human activities<sup>1-3</sup> (Supplementary Figures 1 and 2, Supplementary Table 2). The correlations between the simulated and reported estimates of river discharge, N loads and concentrations all fall between 0.74 and 0.91.

Atmospheric N emissions in LM3-TAN arise from simulated denitrification (on land and within rivers and lakes), fire emissions, and harvested material, which is presumed to be primarily a precursor to atmospheric N pollution via various pathways including wood, biofuel, and waste burning, livestock respiration, emissions from food, human, and livestock waste<sup>4,15,20</sup>. As described in the main text and Methods, the portion of the harvest associated with atmospheric emissions is calculated as the harvest remaining after subtracting manure applications, wastewater discharges to rivers, and the fraction of the harvest used for durable goods (e.g., home building). Manure applications and wastewater discharges are specified model forcings (See Methods, Bouwman and colleagues<sup>15</sup>, Van Drecht and colleagues<sup>30</sup>) and subtracted accordingly, while Zaehle<sup>22</sup> estimated human appropriation of N as 15 TgN yr<sup>-1</sup>. This accounts for a 0.17 fraction of our net harvest, and we consider a range of 0.1-0.3 (Supplementary Note 2) to estimate LM3-TAN's total atmospheric N emissions of 178 (150-198) TgN yr<sup>-1</sup>, which are consistent with 189 TgN yr<sup>-1</sup> estimated by Galloway and colleagues<sup>4</sup> (Supplementary Table 1e).

LM3-TAN simulated soil and freshwater denitrification (N<sub>2</sub>+N<sub>2</sub>O) emissions of 96 (73-98) TgN yr<sup>-1</sup>. This value would be further augmented by denitrification associated with harvested material. If we consider that 0.09 (0-0.2) of the harvested material is denitrified (See Supplementary Note 2), LM3-TAN produced a total denitrification estimate of 104 (73-116) TgN yr<sup>-1</sup>. This compares favorably with denitrification N<sub>2</sub> emission estimates by Galloway and colleagues<sup>4</sup> (115 TgN yr<sup>-1</sup>) and by Bouwman and colleagues<sup>19</sup> (96 TgN yr<sup>-1</sup>) (Supplementary Table 1f). We note that the partitioning of total denitrification into N<sub>2</sub>O (which is discussed in Supplementary Note 2 in the context of pollution estimates) is generally small relative to N<sub>2</sub> emissions<sup>4,19-20,22</sup> and does not affect the agreement in the magnitude of these estimates. Furthermore, subtracting total denitrification from total atmospheric emissions yields an estimate of atmospheric N emissions that are not associated with denitrification (74 (77-82) TgN yr<sup>-1</sup>) which provides a lower bound on other emissions. These fluxes are likely enhanced by denitrification N<sub>2</sub>O emissions (See Supplementary Note 2) and is consistent with emissions of 74 TgN yr<sup>-1</sup> estimated by Galloway and colleagues<sup>4</sup> and 70 (60-82) TgN yr<sup>-1</sup> estimated by Ciais and colleagues<sup>20</sup> and Dentener and colleagues<sup>21</sup> (Supplementary Table 1g).

Simulated N fluxes to the land storage is 32 TgN yr<sup>-1</sup> (Supplementary Table 1h), which is similar in magnitude though less than 60 TgN yr<sup>-1</sup> estimated by Galloway and colleagues<sup>4</sup> and consistent with estimates by other terrestrial ecosystem models (e.g., 27 TgN yr<sup>-1</sup>; Zaehle<sup>22</sup>). Galloway and colleagues<sup>4</sup> and Gruber and Galloway<sup>31</sup> acknowledged significant uncertainty in their global estimate and the gap between our estimate and theirs could be easily closed by higher total land N<sub>r</sub> inputs of Galloway and colleagues<sup>4</sup> (+22 Tg N yr<sup>-1</sup>). Simulated global soils/litter N storage (86124 TgN) is within reported estimates (70000-820000 TgN) by Post and colleagues<sup>23</sup> and references in Post and colleagues<sup>23</sup> (Supplementary Table 1i).

**Supplementary Note 2. Estimation of total land N pollution.** Directly simulated N compartments and fluxes in LM3-TAN provide closed land N budgets and estimates of the total N fluxes from land to the atmosphere and ocean. Not all N fluxes, however, are harmful. N<sub>2</sub> is generally considered benign, as is N sequestered into durable goods (e.g., home building). It has furthermore been suggested that organic N exports from rivers to the coastal ocean are less harmful pollutants than inorganic N exports due to their relative long-lived nature<sup>32</sup>. This is, however, likely to only apply to acute local impacts at river mouths and does not preclude broader impacts on continental shelf and ocean scales. Total land N pollution for our study was thus estimated as total land N outputs, minus the sum of N<sub>2</sub> emissions and human appropriation of the net harvest into durable goods.

To estimate total land N pollution, we did three additional partitioning of the fluxes directly simulated by LM3-TAN: 1) the partitioning of the soil and freshwater denitrification into N<sub>2</sub>O and N<sub>2</sub> emissions, 2) the partitioning of the net harvest into N<sub>2</sub> emissions, and 3) the partitioning of the net harvest transformed into durable goods. To test the robustness of our results to uncertainty in these partitions, an interval for each partition was assigned based on the scientific literature and 1000 Monte Carlo style calculations were conducted with random draws from a uniform distribution across the uncertainty interval. This was done for the baseline simulation, and for the 4 sensitivity simulations with different BNF, fertilizer inputs, and LULUC. Lastly, we created additional 1000 different total land N pollution estimates by excluding river organic N exports. These provided a total of 6000 permutations.

A N<sub>2</sub>O fraction of denitrification emissions can vary significantly in different climate, land use, and time (See Supplementary Materials in Bai and colleagues<sup>33</sup>). Global budgets<sup>4,19-20,22</sup>, however, suggest large scale characteristic values ~0.08-0.11. For a N<sub>2</sub>O fraction of soil and freshwater denitrification, we assigned different intervals: (0, 0.2) for global land and (0, 0.3) for tropical land. The higher upper bound for tropical land was because natural tropical systems have been recognized as a major hotspot of N<sub>2</sub>O emissions<sup>33-34</sup>.

A primary source of N<sub>2</sub> emissions associated with our net harvest are emissions from manure storage systems and wastewater treatment plants. Bouwman and colleagues<sup>19</sup> estimated denitrification (N<sub>2</sub>O+N<sub>2</sub>) emissions from manure storage systems and wastewater treatment plants as 8 TgN yr<sup>-1</sup>, which accounts for a 0.09 fraction of our net harvest. For fractions of the net harvest into N<sub>2</sub> emissions, we assigned an interval (0, 0.2) for both global and tropical lands. We note that N<sub>2</sub>O emissions from these sectors were assumed to be minor relative to N<sub>2</sub> emissions, based on the literature<sup>35</sup> that estimated N<sub>2</sub>O emissions from wastewater treatment plants as 0.3 TgN yr<sup>-1</sup>.

Zaehle<sup>22</sup> estimated human appropriation of N as 15 TgN yr<sup>-1</sup>, which accounts for a 0.17 fraction of our net harvest. For fractions of human appropriation of the net harvest into durable goods, we assigned an interval (0.1, 0.3) for both global and tropical lands.

**Supplementary Note 3. Comparison of simulated and published C balances in various tropical systems.** Tropical NLI, estimated as approximately 1 (0.97-0.99) during 1992-1996 (Figure 3a), suggests that tropical land as a whole (including all kind of land use and land cover, such as agricultural lands, intact and disturbed forests) is nearly N neutral. This result aligns with filtered inverse models against an additional observational constraint, suggesting nearly neutral net C fluxes from tropical land for the same period (1992-1996)<sup>36</sup>. A recent study of plot measurements in Amazonian intact forests demonstrated a long-term increase in the aboveground biomass density since 1983 ( $\sim 0.3 \text{ Mg ha}^{-1} \text{ yr}^{-1}$ )<sup>8</sup>, and a similar pattern during 1983-2005 was captured in our simulation (Supplementary Figure 11). For the same period (1983-2005), however, our simulation suggests that tropical forests as a whole (including both intact and disturbed forests) are a net C source of  $271 \text{ TgC yr}^{-1}$ , based on changes in aboveground C storage. This result appears to be consistent with a recent satellite-data-based study<sup>37</sup>, demonstrating a net C source of  $425 \text{ TgC yr}^{-1}$  from tropical forests during 2003-2014. However, we note that this comparison cannot be done more formally, because of unconsidered terms in Baccini and colleagues<sup>37</sup> approach, such as herbaceous and nonwoody vegetation, and because our simulations do not span the entire Baccini and colleagues<sup>37</sup> period. Analyses of our simulations were limited up to 2005, because the used CMIP5 dataset for land-use changes stops in 2005<sup>7</sup>.

**Supplementary Note 4. Lake N cycle.** Lakes receive dissolved organic N, ammonium, and nitrate plus nitrite from river inflows, and lose those by outflows to rivers and denitrification. Microbial processes in lakes are simulated by first-order loss function with respect to lake N content and with an adjustment for the influence of lake water temperature. Reported nonlinear regression function based on Lotic Intersite Nitrogen experiment reach-scale measurements<sup>28,38-39</sup> was adopted to estimate reaction rate constants of lake denitrification. The lowest measured value (0.034 day<sup>-1</sup>) was set as a minimum reaction rate constant of lake denitrification (Supplementary Table 3). A maximum reaction rate constant of lake denitrification (0.05 day<sup>-1</sup>) was calibrated to match reported and simulated river N exports. Previously used reaction rate constants of river mineralization and nitrification and river temperature reduction function<sup>24</sup> were also used for those of lakes.

$$\frac{dL_{DON}}{dt} = F_{DON}^{in} - F_{DON}^{out} - f_T'' k_{min}'' L_{DON} \quad \text{Supplementary Eq. (1)}$$

$$\frac{dL_{NH_4^+}}{dt} = F_{NH_4^+}^{in} - F_{NH_4^+}^{out} + f_T'' k_{min}'' L_{DON} - f_T'' k_{nit}'' L_{NH_4^+} \quad \text{Supplementary Eq. (2)}$$

$$\frac{dL_{NO_3^-}}{dt} = F_{NO_3^-}^{in} - F_{NO_3^-}^{out} + f_T'' k_{nit}'' L_{NH_4^+} - f_T'' k_{denit}'' L_{NO_3^-} \quad \text{Supplementary Eq. (3)}$$

$$f_T'' = T_p'' (T'' - T_r'') \quad \text{Supplementary Eq. (4)}$$

$$k_{denit}'' = \min \left\{ k_{denit,max}'', \max \left\{ k_{denit,min}'', C_{d,s} \left( b_0 C_{NO_3^-}^{b_1} H^{b_2} c^t \right) \right\} \right\} \quad \text{Supplementary Eq. (5)}$$

where  $i$  is  $DON$ ,  $NH_4^+$ , and  $NO_3^-$ ;  $L_i$  is lake N content (kg m<sup>-2</sup>);  $F_i^{in}$  and  $F_i^{out}$  are river inflows to lakes and river outflows from lakes (kg m<sup>-2</sup> s<sup>-1</sup>);  $f_T''$  is lake temperature reduction function;  $T_p''$  is a parameter;  $T_r''$  is a reference lake temperature (°C);  $T''$  is lake water temperature (°C);  $k_{min}''$ ,  $k_{nit}''$ , and  $k_{denit}''$  are lake mineralization, nitrification, and denitrification (s<sup>-1</sup>);  $k_{denit,min}''$  and  $k_{denit,max}''$  are minimum and maximum reaction rate constants of lake denitrification (s<sup>-1</sup>);  $C_{NO_3^-}$  is lake nitrate-N concentration (μmol L<sup>-1</sup>);  $H$  is lake depth (m);  $b_0$ ,  $b_1$ , and  $b_2$  are constants;  $c^t$  is a log re-transform bias correction factor;  $C_{d,s}$  is a unit-conversion constant (day s<sup>-1</sup>).

## Supplementary References

1. Harrison, J. A., Caraco, N. & Seitzinger, S. P. Global patterns and sources of dissolved organic matter export to the coastal zone: Results from a spatially explicit, global model. *Global Biogeochem. Cy.* **19**, GB4S04 (2005).
2. Meybeck, M., & Ragu, A. *River Discharges to the Oceans: An Assessment of Suspended Solids, Major Ions, and Nutrients* Environment Information and Assessment Technical Report (U.N. Environ. Programme, Nairobi 1996).
3. Dumont, E., Harrison, J., Kroeze, A. C., Bakker, E. J. & Seitzinger, S. P. Global distribution and sources of dissolved inorganic nitrogen export to the coastal zone: Results from a spatially explicit, global model. *Global Biogeochem. Cy.* **19**, GB4S02 (2005).
4. Galloway, J. N. et al. Nitrogen cycle: past, present and future. *Biogeochemistry* **70**, 153–226 (2004).
5. Green, P. A. et al. Pre-industrial and contemporary fluxes of nitrogen through rivers: A global assessment based on typology. *Biogeochem.* **68**, 71–105 (2004).
6. Lu, C. & Tian, H. Global nitrogen and phosphorus fertilizer use for agriculture production in the past half century: shifted hot spots and nutrient imbalance. *Earth Syst. Sci. Data* **9**, 181–192 (2017).
7. Hurtt, G. C. et al. The underpinnings of land-use history: three centuries of global gridded land-use transitions, wood-harvest activity, and resulting secondary lands. *Glob. Change Biol.* **12**, 1208–1229 (2006).
8. Brienen, R. J. W. et al. Long-term decline of the Amazon carbon sink. *Nature* **519**, 344–348 (2015).
9. Lamarque, J. F. et al. Multi-model mean nitrogen and sulfur deposition from the Atmospheric Chemistry and Climate Model Intercomparison Project (ACCMIP): evaluation of historical and projected future changes. *Atmos. Chem. Phys.* **13**, 7997–8018 (2013).
10. U.S. Environmental Protection Agency (USEPA). *Chesapeake Bay Phase 5.3 Community Watershed Model* EPA 903S10002 - CBP/TRS-303-10 (U.S. Environmental Protection Agency, Annapolis, 2010).
11. Herridge, D. F., Peoples, M. B. & Boddey, R. M. Global inputs of biological nitrogen fixation in agricultural systems. *Plant Soil* **311**, 1–18 (2008).
12. Vitousek, P. M., Menge, D. N., Reed, L. S. C. & Cleveland, C. C. Biological nitrogen fixation: Rates, patterns, and ecological controls in terrestrial ecosystems. *Philos. Trans. R. Soc. London B* **368**, 20130119 (2013).
13. Cleveland, C. C. et al. Global patterns of terrestrial biological nitrogen (N<sub>2</sub>) fixation in natural ecosystems. *Global Biogeochem. Cy.* **13**, 623–645 (1999).
14. Cleveland C. C. et al. Patterns of new versus recycled primary production in the terrestrial biosphere. *Proc. Natl Acad. Sci. USA* **110**, 12733–12737 (2013).
15. Bouwman, L. et al. Exploring global changes in nitrogen and phosphorus cycles in agriculture induced by livestock production over the 1900–2050 period. *Proc. Natl Acad. Sci. USA* **110**, 20882–20887 (2013).
16. Galloway et al. Transformation of the nitrogen cycle: recent trends, questions, and potential solutions. *Science* **320**, 889–892 (2008).
17. Mayorga, E. et al. Global nutrient export from WaterSheds 2 (NEWS 2): Model development and implementation. *Environ. Model. Software* **25**, 837–853 (2010).
18. Seitzinger, S. P., et al., 2010: Global river nutrient export: A scenario analysis of past and future trends. *Global Biogeochem. Cy.* **24**, GB0A08.
19. Bouwman, A. F., et al. Global trends and uncertainties in terrestrial denitrification and N<sub>2</sub>O emissions. *Philos. Trans. R. Soc. London Ser. B* **368**, 20130112 (2013).
20. Ciais, P. C. et al. Carbon and other biogeochemical cycles. In *Climate Change 2013: The Physical Science Basis* (eds. Stocker, T.F. et al.) 465–570 (Cambridge Univ. Press, Cambridge, 2013).
21. Dentener, F. et al. The global atmospheric environment for the next generation. *Environ. Sci. Technol.* **40**, 3586–3594 (2006).



22. Zaehle, S. Terrestrial nitrogen–carbon cycle interactions at the global scale. *Phil. Trans. R. Soc. B.* **368**, 20130125 (2013).
23. Post, W. M., Pastor, J., Zinke, P. J. & Stangenberger, A. G. Global patterns of soil nitrogen storage. *Nature* **317**, 613–616 (1985).
24. Lee, M., Malyshev, S., Shevliakova, E., Milly, P. C. D. & Jaffé, P. R. Capturing interactions between nitrogen and hydrological cycles under historical climate and land use: Susquehanna Watershed analysis with the GFDL Land Model LM3-TAN. *Biogeosciences* **11**, 5809–5826 (2014).
25. Gerber, S., Hedin, L. O., Oppenheimer, M., Pacala, S. W. & Shevliakova, E. Nitrogen cycling and feedbacks in a global dynamic land model. *Global Biogeochem. Cy.* **24**, GB1001, doi:10.1029/2008GB003336 (2010).
26. Parton, W. J. et al. Observations and modeling of biomass and soil organic matter dynamics for the grassland biome worldwide. *Global Biogeochem. Cy.* **7**, 785–809 (1993).
27. Cernusak, L. A., Winter, K. & Turner, B. L. Leaf nitrogen to phosphorus ratios of tropical trees: experimental assessment of physiological and environmental controls. *New Phytol.* **185**, 770–779 (2010).
28. Alexander, R. B. et al. Dynamic modeling of nitrogen losses in river networks unravels the coupled effects of hydrological and biogeochemical processes. *Biogeochem.* **93**, 91–116 (2009).
29. Wade, A. J. et al. Nitrogen model for European catchments: INCA, new model structure and equations. *Hydrol. Earth Syst. Sci.* **6**, 559–582 (2002).
30. Van Drecht, G., Bouwman, A. F., Harrison, J. & Knoop, J. M. Global nitrogen and phosphate in urban wastewater for the period 1970 to 2050. *Global Biogeochem. Cy.* **23**, GB0A03, doi:10.1029/2009GB003458 (2009).
31. Gruber, N. & Galloway, J. N. An Earth-system perspective of the global nitrogen cycle. *Nature* **451**, 293–296 (2008).
32. Sipler, R. E. & Bronk, D. A. *Biogeochemistry of Marine Dissolved Organic Matter Ch. 4* (Academic Press, 2014).
33. Bai, E. B., Houlton, Z. & Wang, Y. P. Isotopic identification of nitrogen hotspots across natural terrestrial ecosystems. *Biogeosciences* **9**, 3287–3304 (2012).
34. Bouwman, A. F., Fuag, I., Matthews, E. & John, J. Global analysis of the potential for N<sub>2</sub>O production in natural soils. *Global Biogeochem. Cy.* **7**, 557–597 (1993).
35. Tian H. et al. The terrestrial biosphere as a net source of greenhouse gases to the atmosphere. *Nature* **531**, 225–228 (2016).
36. Stephens, B. B. Weak northern and strong tropical land carbon uptake from vertical profiles of atmospheric CO<sub>2</sub>. *Science* **316**, 1732–1735 (2007).
37. Baccini, A. et al. Tropical forests are a net carbon source based on aboveground measurements of gain and loss. *Science* **358**, 230–234 (2017).
38. Mulholland, P. J. et al. Stream denitrification across biomes and its response to anthropogenic nitrate loading. *Nature* **452**, 202–205 (2008).
39. Mulholland, P. J. et al. Nitrate removal in stream ecosystems measured by <sup>15</sup>N addition experiments: denitrification. *Limnol. Oceanogr.* **54**, 666–680 (2009).
